# Supplementary material
Source: Springer Nature journal article supplement (https://www.springermedizin.de/resource/supplementary/12974_2005_53_MOESM4_ESM.pdf/9600674)

**A**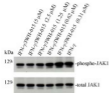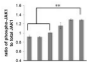**B**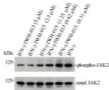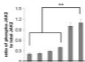**C**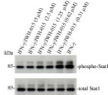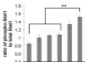

Supplement: MOESM4 [file 9600674]
